# Supplementary material
Source: publisher figshare collection journal article supplement (https://gsapubs.figshare.com/ndownloader/files/34471223)
Supplement: Supplementary file 1 [file 34471223]

## Sheet: Data
Supplementary Table 3. U-Pb isotopic data for zircon from the Little Cottonwood stock and East Traverse Mountains, central Utah
Unit	Sample	Spot	238U/ 206Pb	238U/ 206Pb uncertainty 2 s.e.	207Pb/ 206Pb	207Pb/ 206Pb uuncertainty 2 s.e.	Error correlation	238U/ 206Pb Age (Ma)	Age Uncertainty (m.y.) 2 s.e.	Discordance	Notes
White Pine Phase	CH-031	1	254.194	3.51031	0.0546	0.00907969	-0.10497	25.13	0.347034	16
White Pine Phase	CH-031	2	166.945	3.8673	0.312	0.0518839	-0.23845	29.42	0.681518	190	Discordant
White Pine Phase	CH-031	3	234.082	3.51429	0.051	0.0166126	0.02906	27.33	0.410306	9
White Pine Phase	CH-031	5	221.484	3.40517	0.0653	0.0129698	-0.04956	28.56	0.439092	34
White Pine Phase	CH-031	6	233.263	2.80092	0.0741	0.0120345	-0.20301	26.9	0.323002	46
White Pine Phase	CH-031	7	238.152	2.72758	0.0464	0.00819744	0.047875	27.02	0.309463	-0.4
White Pine Phase	CH-031	9	241.429	2.54714	0.0609	0.00946059	-0.067046	26.31	0.277577	27
White Pine Phase	CH-031	10	240.848	4.50487	0.0495	0.00970901	0.0095725	26.61	0.497719	6.1
White Pine Phase	CH-031	11	254.842	3.11885	0.0584	0.00979831	-0.31234	24.98	0.305715	23
White Pine Phase	CH-031	12	261.165	3.24104	0.0564	0.00945446	0.041908	24.33	0.301934	19
White Pine Phase	CH-031	13	231.054	3.52709	0.06	0.0108706	-0.078974	27.51	0.419947	25
White Pine Phase	CH-031	14	245.881	3.3231	0.0567	0.00927641	-0.047917	25.93	0.350445	20
White Pine Phase	CH-031	15	225.428	3.21203	0.0552	0.00884375	0.12335	28.22	0.402095	17
White Pine Phase	CH-031	16	244.32	2.59035	0.0513	0.00886686	-0.087481	26.22	0.277992	9.7
White Pine Phase	CH-031	17	230.627	3.9297	0.099	0.0227178	-0.3141	26.59	0.453072	75	Discordant
White Pine Phase	CH-031	18	231.374	2.61254	0.051	0.00804174	0.17093	27.65	0.312207	9
White Pine Phase	CH-031	19	232.288	2.28411	0.057	0.00875445	0.060101	27.33	0.268738	20
White Pine Phase	CH-031	20	232.937	3.66934	0.0669	0.0131989	0.0021701	26.91	0.423899	36
White Pine Phase	CH-031	21	176.835	2.4105	0.247	0.035732	-0.53974	29.88	0.407305	170	Discordant
White Pine Phase	CH-031	22	225.734	2.55419	0.0616	0.00991884	-0.055162	28.11	0.318066	28
White Pine Phase	CH-031	23	248.262	5.32503	0.057	0.0152539	-0.6147	25.67	0.550601	20
White Pine Phase	CH-031	24	207.857	2.84219	0.065	0.0150602	0.023976	30.22	0.413221	33
White Pine Phase	CH-031	25	241.779	4.32677	0.0479	0.00998651	0.1546	26.56	0.475305	2.8
White Pine Phase	CH-031	27	232.072	3.50828	0.0463	0.0101418	0.18254	27.73	0.4192	-0.65
White Pine Phase	CH-031	28	233.809	3.10455	0.0654	0.0122911	0.15087	26.86	0.356652	34
White Pine Phase	CH-031	30	229.043	2.88039	0.114	0.0205845	-0.18547	26.4	0.332001	89	Discordant
White Pine Phase	CH-031	31	252.781	3.3756	0.0684	0.0127381	-0.090199	24.96	0.333313	38
White Pine Phase	CH-031	32	248.016	3.98767	0.076	0.0132522	0.22582	24.98	0.401636	49	Discordant
White Pine Phase	CH-031	33	247.586	3.51031	0.0912	0.0151206	-0.30143	24.95	0.353744	67	Discordant
Clast in pebble dike	CH-036	1	240.558	2.04699	0.0511	0.00967276	0.13717	26.59	0.226263	9.3
Clast in pebble dike	CH-036	2	219.587	1.4946	0.0484	0.00904807	0.14339	29.225	0.198918	3.7
Clast in pebble dike	CH-036	3	220.264	1.53295	0.0479	0.00847787	0.026544	29.15	0.202872	2.7
Clast in pebble dike	CH-036	4	243.132	3.76537	0.0467	0.0104096	0.36288	26.46	0.409786	0.27
Clast in pebble dike	CH-036	5	214.684	1.96174	0.0472	0.00995622	0.19693	29.94	0.273586	1.2
Clast in pebble dike	CH-036	6	230.521	2.03731	0.046	0.0147177	0.29046	27.9	0.246576	-1.3
Clast in pebble dike	CH-036	7	236.183	3.20142	0.0524	0.0121004	0.014844	27.04	0.366522	12
Clast in pebble dike	CH-036	8	225.836	2.4877	0.0626	0.0125324	0.0099285	27.91	0.307444	29
Clast in pebble dike	CH-036	9	221.926	1.45522	0.046	0.00721249	0.0027688	28.982	0.190042	-1.3
Clast in pebble dike	CH-036	10	224.719	1.9535	0.0414	0.00997016	0.10869	28.62	0.248795	-12
Clast in pebble dike	CH-036	11	232.992	2.92289	0.043	0.0136236	0.098359	27.61	0.346369	-8
Clast in pebble dike	CH-036	12	220.604	1.63711	0.0469	0.00992427	0.17689	29.15	0.216323	0.58
Clast in pebble dike	CH-036	13	215.61	1.82589	0.0494	0.011428	0.1182	29.73	0.251767	5.7
Clast in pebble dike	CH-036	14	210.793	2.05048	0.054	0.0144779	0.023984	30.23	0.294061	15
Clast in pebble dike	CH-036	15	231.054	2.0451	0.0542	0.0119074	0.051899	27.57	0.244028	15
Clast in pebble dike	CH-036	16	210.526	1.43692	0.0462	0.00776369	0.0017727	30.63	0.209061	-0.98
Clast in pebble dike	CH-036	17	229.568	1.81731	0.0471	0.0104501	0.10897	28	0.221654	1.1
Clast in pebble dike	CH-036	18	224.467	2.07296	0.045	0.00951065	0.047027	28.65	0.264583	-3.5
Clast in pebble dike	CH-036	19	211.238	1.76635	0.0481	0.0100527	0.11191	30.39	0.254118	3.1
Clast in pebble dike	CH-036	20	217.77	1.60554	0.0517	0.00939308	0.088956	29.35	0.216388	10
Clast in pebble dike	CH-036	21	219.058	1.87362	0.0487	0.0101175	0.037802	29.28	0.250434	4.3
Clast in pebble dike	CH-036	22	222.025	1.68869	0.0522	0.0111229	0.018892	28.77	0.218821	11
Clast in pebble dike	CH-036	23	229.832	2.4275	0.056	0.018071	0.19018	27.66	0.292146	18
Clast in pebble dike	CH-036	24	237.417	4.62095	0.048	0.0386761	0.16558	27.05	0.526486	3
Clast in pebble dike	CH-036	26	222.717	3.10133	0.0486	0.0122141	0.088293	28.81	0.401178	4.2
Clast in pebble dike	CH-036	27	225.327	2.5226	0.0482	0.010783	0.20756	28.49	0.318954	3.3
Clast in pebble dike	CH-036	28	220.507	1.74307	0.0446	0.0104286	0.027537	29.17	0.230584	-4.4
Clast in pebble dike	CH-036	29	215.378	2.28758	0.0481	0.00964449	0.058559	29.81	0.316619	3.1
Clast in pebble dike	CH-036	30	240.385	2.04459	0.0494	0.00922811	0.32875	26.67	0.226841	5.9
Clast in pebble dike	CH-036	31	219.491	1.84161	0.0609	0.0120772	0.2728	28.78	0.241475	27
Clast in pebble dike	CH-036	32	217.817	1.85636	0.0464	0.00938784	0.030905	29.54	0.251757	-0.51
Clast in pebble dike	CH-036	33	225.479	1.92381	0.0483	0.00940691	0.061355	28.47	0.242909	3.5
Clast in pebble dike	CH-036	34	222.816	1.73456	0.0472	0.010683	0.028819	28.85	0.224588	1.2
Clast in pebble dike	CH-036	35	226.449	1.89685	0.0455	0.00935631	0.10685	28.4	0.237893	-2.4
Clast in pebble dike	CH-036	36	229.674	2.99173	0.0458	0.0107744	0.23062	28.01	0.364858	-1.7
Clast in pebble dike	CH-036	37	247.525	11.1032	0.0524	0.0104589	0.25352	25.8	1.15731	12
Clast in pebble dike	CH-036	38	212.134	1.70878	0.0437	0.00909165	0.1353	30.32	0.244233	-6.5
Clast in pebble dike	CH-036	39	223.364	1.63274	0.0503	0.0100904	0.12593	28.66	0.209498	7.6
Clast in pebble dike	CH-036	40	217.675	2.24839	0.0452	0.00912022	0.13009	29.55	0.305224	-3.1
Clast in pebble dike	CH-036	41	222.568	2.60002	0.055	0.0145624	0.13455	28.59	0.333985	17
Clast in pebble dike	CH-036	42	227.531	1.75356	0.0469	0.00931135	0.080704	28.26	0.217797	0.62
Clast in pebble dike	CH-036	25	163.132	4.34161	0.318	0.0940015	0.11659	25.9	0.689305	190	Discordant
Pebble dike matrix	CH-039	1	5.18672	0.101045	0.0784	0.00751024	0.23165	1135.5	22.1212	0.96	pC Xenocryst
Pebble dike matrix	CH-039	2	6.69703	0.0860138	0.0896	0.0019521	0.10898	875.6	11.2458	25	pC Xenocryst
Pebble dike matrix	CH-039	3	209.074	2.94273	0.053	0.00660532	-0.15687	30.59	0.430557	13
Pebble dike matrix	CH-039	4	5.7241	0.0725508	0.0833	0.00362401	0.087047	1026.7	13.013	12	pC Xenocryst
Pebble dike matrix	CH-039	5	5.72443	0.0674765	0.0811	0.00282921	0.034166	1029.3	12.1328	9.1	pC Xenocryst
Pebble dike matrix	CH-039	6	211.506	2.7554	0.0465	0.00350771	-0.063132	30.41	0.396167	-0.33
Pebble dike matrix	CH-039	7	3.93701	0.0570907	0.1067	0.00285037	0.27909	1434.3	20.7988	13	pC Xenocryst
Pebble dike matrix	CH-039	8	3.51617	0.056219	0.1007	0.00532386	0.27429	1611.3	25.7626	1.1	pC Xenocryst
Pebble dike matrix	CH-039	9	225.836	2.94465	0.0473	0.00460608	-0.00059441	28.46	0.371087	1.5
Pebble dike matrix	CH-039	10	210.793	2.76745	0.0494	0.0050061	0.052239	30.4	0.399115	5.7
Pebble dike matrix	CH-039	11	197.981	2.63842	0.047	0.00500552	0.050485	32.47	0.432716	0.66
Pebble dike matrix	CH-039	12	202.47	2.46907	0.0463	0.00290923	0.0071972	31.78	0.387549	-0.82
Pebble dike matrix	CH-039	13	5.41419	0.0723264	0.0757	0.00401787	-0.15147	1092.8	14.5984	-0.32	pC Xenocryst
Pebble dike matrix	CH-039	14	209.38	2.6968	0.0466	0.00470577	-0.20077	30.72	0.395671	-0.13
Pebble dike matrix	CH-039	15	215.424	2.59897	0.0514	0.00360916	0.079001	29.68	0.358071	9.7
Pebble dike matrix	CH-039	16	212.495	3.18767	0.0475	0.00640441	0.027757	30.23	0.453485	1.8
Pebble dike matrix	CH-039	17	5.73296	0.0696554	0.0738	0.00135136	0.19738	1036.5	12.5935	-0.062	pC Xenocryst
Pebble dike matrix	CH-039	18	211.551	2.60176	0.0457	0.00470555	0.16219	30.44	0.374367	-2.1
Pebble dike matrix	CH-039	19	215.239	3.61619	0.047	0.0110025	0.04626	29.87	0.50184	0.76
Pebble dike matrix	CH-039	20	207.125	2.7768	0.0463	0.0047057	0.0075146	31.06	0.416402	-0.79
Pebble dike matrix	CH-039	21	208.29	3.01016	0.0489	0.0065046	-0.31355	30.81	0.445259	4.7
Pebble dike matrix	CH-039	22	210.748	2.69628	0.0575	0.00261585	0.0783	30.1	0.385095	21
Pebble dike matrix	CH-039	23	5.59097	0.0648688	0.0731	0.00125443	0.11121	1062.7	12.3299	-2	pC Xenocryst
Pebble dike matrix	CH-039	24	5.9988	0.0852521	0.0724	0.00164044	0.12482	993.8	14.1234	0.11	pC Xenocryst
Pebble dike matrix	CH-039	25	217.014	3.84489	0.0469	0.00780352	0.39414	29.63	0.524962	0.56
Pebble dike matrix	CH-039	26	211.506	3.90113	0.044	0.0078031	0.19055	30.51	0.562742	-5.9
Pebble dike matrix	CH-039	27	198.61	3.93599	0.043	0.0120019	0.27179	32.53	0.644671	-8.2
Pebble dike matrix	CH-039	28	5.39665	0.0661225	0.0734	0.00203339	-0.092637	1098.4	13.4582	-3.5	pC Xenocryst
Pebble dike matrix	CH-039	29	7.39098	0.127586	0.0782	0.00145358	-0.17186	806.7	13.9256	16	pC Xenocryst
Pebble dike matrix	CH-039	30	5.0638	0.0580691	0.0781	0.00174427	-0.020987	1162.5	13.3309	-0.63	pC Xenocryst
White Pine Phase	CH-041	9	230.681	3.75442	0.096	0.00261677	0.11091	26.14	0.425439	73	Discordant
White Pine Phase	CH-041	10	232.937	3.65359	0.04719	0.00115618	0.22764	27.6	0.432902	1.3
White Pine Phase	CH-041	11	240.269	4.87701	0.04713	0.00103971	-0.21479	26.75	0.542974	1.2	Discordant
White Pine Phase	CH-041	12	192.678	6.65761	0.0453	0.00218101	-0.11794	33.43	1.15511	-3.1
White Pine Phase	CH-041	13	240.385	6.88439	0.0518	0.00336801	0.39711	26.58	0.761226	11	Discordant
White Pine Phase	CH-041	14	233.046	3.8141	0.0474	0.00143865	0.20294	27.58	0.451382	1.7
White Pine Phase	CH-041	15	248.262	3.80547	0.0497	0.00127571	0.28837	25.81	0.395627	6.6	Discordant
White Pine Phase	CH-041	16	232.504	4.83944	0.04797	0.00117851	0.22205	27.62	0.574894	2.9	Discordant
White Pine Phase	CH-041	17	232.396	4.12742	0.0629	0.00320603	0.12907	27.11	0.481482	30	Discordant
White Pine Phase	CH-041	18	221.729	3.39379	0.0562	0.00157917	-0.028977	28.76	0.440201	19	Discordant
White Pine Phase	CH-041	21	237.586	3.31052	0.04985	0.0012767	-0.010436	27	0.376217	6.8	Discordant
White Pine Phase	CH-041	22	121.065	4.59429	0.401	0.0168278	-0.88867	36.33	1.37868	220	Discordant
White Pine Phase	CH-041	23	223.264	4.8973	0.0538	0.00202464	0.37189	28.54	0.626025	14	Discordant
White Pine Phase	CH-041	24	244.141	4.86209	0.0496	0.00181818	-0.16186	26.25	0.522772	6.3	Discordant
White Pine Phase	CH-041	25	231.642	4.1905	0.05165	0.00128874	-0.061103	27.65	0.500199	10	Discordant
White Pine Phase	CH-041	26	211.909	3.66566	0.075	0.00344102	-0.43459	29.26	0.506147	48	Discordant
White Pine Phase	CH-041	27	244.32	5.42773	0.0484	0.00144426	0.10933	26.27	0.583607	3.9
White Pine Phase	CH-041	28	232.396	4.56372	0.0495	0.00248477	0.17828	27.58	0.541607	6
White Pine Phase	CH-041	31	224.719	11.8748	0.0499	0.00210257	0.1074	28.51	1.50655	6.8	Discordant
White Pine Phase	CH-041	32	238.209	4.94951	0.0482	0.00126595	-0.11978	26.95	0.559968	3.4
White Pine Phase	CH-041	33	230.044	4.70705	0.0482	0.00126595	0.34954	27.91	0.571082	3.5
White Pine Phase	CH-041	34	236.072	3.80892	0.04986	0.00106894	0.048696	27.13	0.437731	6.8	Discordant
White Pine Phase	CH-041	35	171.821	4.5448	0.1798	0.00891198	-0.17727	32.99	0.87261	140	Discordant
White Pine Phase	CH-041	36	232.992	3.73305	0.05469	0.00130976	0.21135	27.33	0.437888	16	Discordant
White Pine Phase	CH-041	37	227.687	5.06854	0.0813	0.00452516	-0.19298	27.38	0.609507	56	Discordant
White Pine Phase	CH-041	38	202.02	5.75217	0.09	0.0100682	-0.33291	30.61	0.871566	66	Discordant
White Pine Phase	CH-041	41	234.797	4.19667	0.0628	0.0024406	-0.47214	26.84	0.479728	31	Discordant
White Pine Phase	CH-041	42	233.754	4.6999	0.0488	0.00172118	0.14867	27.44	0.551714	4.6
White Pine Phase	CH-041	43	244.678	4.25275	0.04609	0.0011572	-0.090261	26.31	0.457294	-1
White Pine Phase	CH-041	44	197.824	3.97496	0.0586	0.00242288	-0.30463	32.02	0.643391	23	Discordant
White Pine Phase	CH-041	45	212.404	4.7238	0.0522	0.00155579	-0.12304	30.07	0.668747	11	Discordant
White Pine Phase	CH-041	46	230.415	5.88307	0.0522	0.00230228	0.1618	27.72	0.707761	11	Discordant
White Pine Phase	CH-041	47	236.239	3.46245	0.04698	0.00116323	0.32394	27.22	0.398952	0.84
White Pine Phase	CH-041	50	234.632	4.59245	0.0459	0.00199149	0.12259	27.44	0.537083	-1.5
White Pine Phase	CH-041	51	215.75	5.14212	0.0488	0.00238589	0.095357	29.74	0.708815	4.5
White Pine Phase	CH-041	52	237.248	3.67621	0.05343	0.00130094	0.14681	26.89	0.416667	14	Discordant
White Pine Phase	CH-041	53	243.784	3.91519	0.0501	0.00172748	0.33314	26.27	0.4219	7.4	Discordant
White Pine Phase	CH-041	54	240.906	3.37452	0.0493	0.00136042	0.26487	26.61	0.372743	5.7	Discordant
White Pine Phase	CH-041	55	233.645	6.03374	0.0606	0.00397877	0.50533	27.05	0.69855	27	Discordant
White Pine Phase	CH-041	56	219.974	4.36183	0.0525	0.00259149	0.39772	29.02	0.575434	12	Discordant
White Pine Phase	CH-041	57	216.45	5.677	0.1139	0.00618001	-0.6489	27.18	0.712869	92	Discordant
White Pine Phase	CH-041	58	224.82	4.86983	0.0796	0.00384198	0.083814	27.42	0.593944	54	Discordant
White Pine Phase	CH-041	61	231.214	5.63219	0.0479	0.00144144	0.051146	27.78	0.676699	2.7
White Pine Phase	CH-041	62	198.02	5.90601	0.0471	0.00276856	0.091509	32.46	0.968131	0.87
White Pine Phase	CH-041	63	233.046	5.71265	0.0474	0.00316065	-0.10007	27.59	0.676313	1.7
White Pine Phase	CH-041	64	222.668	4.2075	0.1184	0.00561508	0.031504	26.26	0.496206	93	Discordant
White Pine Phase	CH-041	65	207.383	4.64193	0.1398	0.00694211	-0.18471	28.44	0.636583	110	Discordant
White Pine Phase	CH-041	66	185.529	7.18031	0.216	0.0221785	-0.69417	29.44	1.13938	150	Discordant
White Pine Phase	CH-041	67	241.022	3.52541	0.0476	0.00126211	0.025771	26.66	0.389953	2.2	Discordant
White Pine Phase	CH-041	68	199.005	4.35278	0.089	0.0150446	-0.72705	31.1	0.680242	65	Discordant
White Pine Phase	CH-041	69	222.519	4.61436	0.076	0.0130375	-0.59061	28.15	0.583745	49	Discordant
White Pine Phase	CH-041	70	211.73	4.01671	0.0953	0.00495731	0.044817	28.51	0.540861	72	Discordant
White Pine Phase	CH-041	71	227.687	4.3667	0.071	0.00247829	0.075058	27.38	0.525108	42	Discordant
White Pine Phase	CH-041	72	187.266	5.32423	0.0523	0.00211241	0.021581	34.08	0.968941	11	Discordant
White Pine Phase	CH-041	73	230.309	4.80615	0.0455	0.00266643	0.2012	27.97	0.583687	-2.4
White Pine Phase	CH-041	76	239.923	3.57913	0.0597	0.0020524	0.0018338	26.37	0.393383	25	Discordant
White Pine Phase	CH-041	77	242.131	3.51025	0.0489	0.00118495	0.090226	26.49	0.384034	4.9	Discordant
White Pine Phase	CH-041	78	240.211	3.95497	0.0488	0.00135737	0.064006	26.71	0.439768	4.7	Discordant
White Pine Phase	CH-041	79	246.853	3.81603	0.0493	0.0018168	0.16194	25.97	0.401463	5.7	Discordant
White Pine Phase	CH-041	80	249.377	3.58041	0.04853	0.00106659	0.16587	25.73	0.369417	4.2	Discordant
White Pine Phase	CH-041	81	238.607	4.81961	0.0474	0.00162164	-0.20287	26.93	0.543959	1.7
White Pine Phase	CH-041	82	218.962	3.43222	0.0566	0.0018524	0.17782	29	0.454573	19	Discordant
White Pine Phase	CH-041	83	225.225	7.52144	0.0724	0.00686483	-0.37185	27.63	0.922709	44	Discordant
White Pine Phase	CH-041	84	235.018	3.66364	0.0551	0.0015726	0.067944	27.08	0.422144	17	Discordant
White Pine Phase	CH-041	85	216.92	5.69948	0.04641	0.00114233	0.11865	29.66	0.779305	-0.49
White Pine Phase	CH-041	86	240.79	4.99297	0.0473	0.00162114	0.12306	26.69	0.553439	1.5
White Pine Phase	CH-041	87	213.22	8.07669	0.0463	0.00143258	-0.22924	30.18	1.14321	-0.78
White Pine Phase	CH-041	90	220.022	5.19689	0.0493	0.00163118	-0.00078669	29.14	0.688282	5.6	Discordant
White Pine Phase	CH-041	91	235.516	4.76036	0.0478	0.00171643	0.21612	27.27	0.551194	2.6
White Pine Phase	CH-041	92	194.477	3.67475	0.04805	0.00117906	0.10427	33	0.623554	2.8
White Pine Phase	CH-041	93	239.866	6.17323	0.0504	0.00219984	0.44951	26.69	0.686899	8.1	Discordant
White Pine Phase	CH-041	94	185.529	5.23326	0.0596	0.0044677	0.011477	34.1	0.961868	24	Discordant
White Pine Phase	CH-041	95	242.718	4.10822	0.05214	0.00120807	-0.016705	26.38	0.446504	11	Discordant
White Pine Phase	CH-041	96	229.358	10.3085	0.0678	0.00636136	-0.4421	27.29	1.22655	38	Discordant
White Pine Phase	CH-041	97	236.855	4.03837	0.0669	0.00370356	-0.37063	26.46	0.451143	36	Discordant
White Pine Phase	CH-041	98	237.869	4.06581	0.0667	0.00448463	-0.39343	26.35	0.450392	36	Discordant
White Pine Phase	CH-041	99	214.133	5.56671	0.04684	0.00106192	-0.12131	30.03	0.780676	0.42
White Pine Phase	CH-041	100	235.96	3.88835	0.0479	0.00199944	-0.073229	27.23	0.448718	2.8
White Pine Phase	CH-041	101	238.095	3.90105	0.05004	0.00115138	0.060541	26.9	0.440741	7.2	Discordant
White Pine Phase	CH-041	102	239.063	4.93164	0.0467	0.00125641	0.25118	26.9	0.554922	0.25	Discordant
White Pine Phase	CH-041	103	236.463	3.98527	0.04641	0.00115936	0.27207	27.21	0.458589	-0.39
White Pine Phase	CH-041	104	232.019	4.50676	0.0454	0.00198956	0.24395	27.77	0.539408	-2.6	Discordant
Red Pine porphry	CH-053	1	249.563	2.68224	0.0847	0.001945	-0.25698	24.54	0.263749	61	Discordant
Red Pine porphry	CH-053	3	250.438	1.94966	0.0518	0.00185556	-0.034795	25.569	0.199055	11	Discordant
Red Pine porphry	CH-053	4	242.424	2.96173	0.055	0.00195933	0.15362	26.25	0.3207	17	Discordant
Red Pine porphry	CH-053	5	264.34	2.5511	0.0475	0.00126916	0.24856	24.31	0.234611	2.1
Red Pine porphry	CH-053	6	246.488	2.22312	0.0499	0.00118257	0.09161	25.99	0.234409	6.9
Red Pine porphry	CH-053	7	236.295	2.16449	0.048	0.00155705	0.11515	27.18	0.248972	3
Red Pine porphry	CH-053	8	228.938	2.1394	0.0513	0.00146942	-0.061893	27.98	0.26147	9.6	Discordant
Red Pine porphry	CH-053	9	259	2.57625	0.05171	0.000952885	0.12265	24.68	0.24549	11	Discordant
Red Pine porphry	CH-053	10	250.752	3.43303	0.0498	0.0013703	0.21241	25.55	0.349803	6.7
Red Pine porphry	CH-053	11	252.461	2.01917	0.04833	0.000791009	-0.029528	25.44	0.203467	3.7
Red Pine porphry	CH-053	12	237.079	2.31349	0.0613	0.00159199	-0.14853	27.11	0.264548	28	Discordant
Red Pine porphry	CH-053	13	258.398	2.0924	0.05231	0.00105338	0.23138	24.718	0.200156	12	Discordant
Red Pine porphry	CH-053	14	259.605	2.36637	0.04775	0.000788339	-0.20973	24.75	0.225602	2.6
Red Pine porphry	CH-053	15	267.38	3.99788	0.0473	0.00117445	0.31931	24.04	0.359448	1.7
Red Pine porphry	CH-053	16	238.322	3.65124	0.0473	0.00511658	-0.46981	26.97	0.413197	1.5
Red Pine porphry	CH-053	17	226.142	2.26437	0.0462	0.00107775	-0.17198	28.46	0.284971	-0.9
Red Pine porphry	CH-053	18	240.79	1.83873	0.04649	0.000650915	-0.14839	26.72	0.20404	-0.2
Red Pine porphry	CH-053	19	232.072	2.18815	0.04618	0.00105916	-0.46538	27.73	0.261459	-0.92
Red Pine porphry	CH-053	20	223.614	2.34799	0.0466	0.00165057	-0.38777	28.77	0.302092	-0.045
Red Pine porphry	CH-053	21	251.383	2.29565	0.05122	0.000995325	0.14871	25.44	0.232321	9.5
Red Pine porphry	CH-053	22	251.13	3.3274	0.0551	0.00176629	-0.39565	25.34	0.335748	17	Discordant
Red Pine porphry	CH-053	23	235.516	2.28791	0.0514	0.00156524	-0.41526	27.15	0.263747	9.9
Red Pine porphry	CH-053	24	247.402	2.09383	0.0498	0.00118225	0.24082	25.9	0.219198	6.7
Red Pine porphry	CH-053	25	230.894	2.76164	0.054	0.00176372	-0.17051	27.68	0.331072	15	Discordant
Red Pine porphry	CH-053	26	242.777	4.11288	0.0553	0.00215441	-0.064015	26.29	0.445378	17	Discordant
Red Pine porphry	CH-053	27	181.159	5.02263	0.221	0.0151227	-0.69099	35.42	0.982017	160	Discordant
Red Pine porphry	CH-053	28	237.812	2.7116	0.0509	0.00166015	0.19412	26.9	0.306722	8.9
Red Pine porphry	CH-053	29	228.311	4.90683	0.0535	0.00205345	0.087864	27.93	0.600269	14	Discordant
Red Pine porphry	CH-053	30	246.184	2.21867	0.0552	0.00167052	-0.36871	25.85	0.232966	17	Discordant
Red Pine porphry	CH-053	31	244.379	2.68913	0.0649	0.00207817	0.037193	25.72	0.283021	33	Discordant
Red Pine porphry	CH-053	32	243.25	2.03879	0.0529	0.00166488	0.16495	26.24	0.21993	13	Discordant
Red Pine porphry	CH-053	33	248.201	2.1045	0.0494	0.0013692	0.056398	25.83	0.219013	5.9
Red Pine porphry	CH-053	34	229.991	1.75506	0.0457	0.00103908	0.23592	28	0.213667	-2
Red Pine porphry	CH-053	35	220.264	3.51451	0.0475	0.00108202	-0.041943	29.18	0.465592	1.9
Red Pine porphry	CH-053	36	224.115	3.67837	0.0618	0.00373886	-0.64598	28.15	0.462023	29	Discordant
Little Cottonwood stock	CH-72	1	217.061	3.99135	0.0509	0.00217539	0.2797	29.74	0.546864	-1.4
Little Cottonwood stock	CH-72	2	219.01	4.12471	0.0578	0.00211762	-0.12478	29.39	0.553515	5
Little Cottonwood stock	CH-72	3	208.899	3.81833	0.0473	0.00172589	-0.084383	29.47	0.538662	9	Discordant
Little Cottonwood stock	CH-72	4	219.346	4.81261	0.0463	0.00156357	-0.335	29.35	0.643959	-1.4
Little Cottonwood stock	CH-72	5	194.401	3.93719	0.0476	0.00196598	0.32897	29.23	0.591992	10	Discordant
Little Cottonwood stock	CH-72	6	210.261	4.51249	0.0479	0.0016618	0.035574	29.07	0.623884	38	Discordant
Little Cottonwood stock	CH-72	7	216.779	3.66544	0.0468	0.00171802	0.27073	30.12	0.509289	0.75
Little Cottonwood stock	CH-72	8	220.994	3.84773	0.047	0.00164693	0.051594	29.09	0.506485	0.8
Little Cottonwood stock	CH-72	9	222.568	3.73931	0.0472	0.001579	0.14836	28.89	0.485373	0.81
Little Cottonwood stock	CH-72	10	230.468	5.15522	0.0469	0.00164529	0.063925	27.9	0.624082	0.85
Little Cottonwood stock	CH-72	11	218.15	4.37433	0.0477	0.00173221	0.024418	29.66	0.594741	0.78
Little Cottonwood stock	CH-72	12	219.877	3.89866	0.04767	0.00137351	0.16717	29.2	0.517748	2.9
Little Cottonwood stock	CH-72	13	17.7873	0.381079	0.8201	0.0213999	0.25747	7.408	0.158711	280	Discordant
Little Cottonwood stock	CH-72	14	211.999	4.86768	0.04751	0.00141034	-0.20549	30.78	0.706735	0.73
Little Cottonwood stock	CH-72	15	218.15	3.71592	0.04878	0.00140676	0.094337	29.66	0.505222	2.9
Little Cottonwood stock	CH-72	16	212.224	3.7498	0.04657	0.00146041	0.16477	30.53	0.539436	2.8
Little Cottonwood stock	CH-72	17	163.693	3.55612	0.2274	0.00943798	-0.46234	32.97	0.716251	160	Discordant
Little Cottonwood stock	CH-72	18	216.45	4.0312	0.0478	0.00158936	-0.31179	30.24	0.563194	-1.4
Little Cottonwood stock	CH-72	19	218.818	7.03697	0.05067	0.00146115	-0.26778	29.43	0.946437	2.9
Little Cottonwood stock	CH-72	20	222.222	4.20776	0.0486	0.00206167	0.17493	28.86	0.546462	5
Little Cottonwood stock	CH-72	21	121.212	3.20934	0.345	0.0145794	-0.082767	38.93	1.03075	200	Discordant
Little Cottonwood stock	CH-72	22	215.285	3.86958	0.0678	0.00306721	-0.44397	30.28	0.544259	2.9
Little Cottonwood stock	CH-72	23	241.313	4.9906	0.04761	0.00129059	-0.35197	26.61	0.550322	3.2
Little Cottonwood stock	CH-72	24	224.014	3.99341	0.0495	0.00154005	0.41888	28.59	0.509662	7.1
Little Cottonwood stock	CH-72	25	219.78	4.14455	0.0486	0.00190013	0.13263	29.18	0.550267	5
Little Cottonwood stock	CH-72	26	219.394	4.16392	0.0472	0.0018009	-0.037525	29.31	0.556279	0.79
Little Cottonwood stock	CH-72	27	189.897	4.02859	0.0468	0.00212169	-0.093419	29.07	0.616707	22	Discordant
Little Cottonwood stock	CH-72	28	211.193	3.37349	0.04664	0.00136432	-0.087714	33.02	0.527444	2.8
Little Cottonwood stock	CH-72	29	224.316	3.6478	0.0471	0.00133488	-0.16367	28.66	0.466066	0.82
Little Cottonwood stock	CH-72	30	216.403	3.81993	0.0464	0.00171175	-0.11588	30.29	0.534676	0.75
Little Cottonwood stock	CH-72	31	225.581	3.69151	0.04625	0.0012054	0.18433	28.54	0.467042	-1.3
Little Cottonwood stock	CH-72	32	242.014	5.56436	0.0474	0.00151464	0.11229	26.57	0.610896	0.9
Little Cottonwood stock	CH-72	33	227.842	3.999	0.0475	0.00151644	0.070002	28.18	0.494605	2.9
Little Cottonwood stock	CH-72	34	239.808	6.78314	0.047	0.00150744	0.53748	26.81	0.758339	0.94
Little Cottonwood stock	CH-72	35	210.748	4.10612	0.0468	0.00171802	0.14481	33.85	0.659517	0.6
Little Cottonwood stock	CH-72	36	213.402	3.55584	0.04655	0.00127288	0.061059	30.44	0.507212	0.74
Little Cottonwood stock	CH-72	37	212.857	3.83783	0.0463	0.00146194	-0.27848	30.5	0.549919	0.74
Little Cottonwood stock	CH-72	38	224.417	5.28895	0.0487	0.00174817	-0.24986	28.58	0.673561	5
Little Cottonwood stock	CH-72	39	158.228	4.02816	0.184	0.0127868	-0.82942	33.58	0.854879	140	Discordant
Little Cottonwood stock	CH-72	40	129.032	3.02972	0.3234	0.0109331	-0.281	37.55	0.881687	200	Discordant
Little Cottonwood stock	CH-72	41	40.1123	1.09688	0.662	0.016813	-0.17894	72.24	1.97542	270	Discordant
Little Cottonwood stock	CH-72	42	223.214	5.63632	0.0473	0.00158072	-0.17263	28.8	0.72722	0.81
Little Cottonwood stock	CH-72	43	86.6551	4.54511	0.51	0.0243067	-0.88384	43.54	2.2837	250	Discordant
Little Cottonwood stock	CH-73	5	217.439	3.42752	0.0462	0.00167743	0.10459	29.6	0.466589	-0.94
Little Cottonwood stock	CH-73	6	228.519	3.35852	0.04661	0.00114219	0.11853	28.15	0.413718	0.0027
Little Cottonwood stock	CH-73	7	214.684	3.77027	0.0527	0.0017524	-0.10336	29.8	0.523345	12	Discordant
Little Cottonwood stock	CH-73	8	226.449	3.29813	0.048	0.00161604	0.21682	28.35	0.412905	2.9
Little Cottonwood stock	CH-73	9	208.768	2.95813	0.0792	0.00225146	-0.14523	29.91	0.423808	53	Discordant
Little Cottonwood stock	CH-73	10	219.202	3.0073	0.04632	0.00132692	0.12324	29.35	0.402662	-0.67
Little Cottonwood stock	CH-73	11	143.062	2.92016	0.0545	0.00482474	-0.10607	44.6	0.910371	15	Discordant
Little Cottonwood stock	CH-73	12	229.2	3.44722	0.0465	0.00185065	0.069185	28.07	0.422179	-0.23
Little Cottonwood stock	CH-73	13	228.99	3.52494	0.048	0.00146	0.0677	28.04	0.431632	2.9
Little Cottonwood stock	CH-73	14	222.124	3.18008	0.04634	0.00134884	0.19451	28.97	0.414755	-0.61
Little Cottonwood stock	CH-73	15	224.568	3.63665	0.0489	0.00179067	0.028348	28.56	0.462501	4.8
Little Cottonwood stock	CH-73	16	223.564	3.16355	0.04894	0.00135017	0.05762	28.69	0.405979	4.9
Little Cottonwood stock	CH-73	17	208.073	3.4645	0.0471	0.00160542	0.13225	30.89	0.514331	0.93
Little Cottonwood stock	CH-73	18	216.732	3.41283	0.0492	0.00163042	-0.28183	29.58	0.46579	5.4
Little Cottonwood stock	CH-73	19	226.757	3.37597	0.0553	0.00282546	-0.74084	28.06	0.417758	17	Discordant
Little Cottonwood stock	CH-73	20	210.128	3.07544	0.0469	0.00137107	-0.053279	30.6	0.447863	0.52
Little Cottonwood stock	CH-73	21	213.083	3.02923	0.0463	0.00123688	-0.10395	30.19	0.429187	-0.75
Little Cottonwood stock	CH-73	22	217.014	3.03918	0.04702	0.00123465	0.024456	29.62	0.414814	0.82
Little Cottonwood stock	CH-73	23	217.628	3.03163	0.0465	0.00104657	-0.079781	29.56	0.411781	-0.29
Little Cottonwood stock	CH-73	24	211.909	3.47038	0.0464	0.00176385	-0.017628	30.36	0.497197	-0.54
Little Cottonwood stock	CH-73	25	219.684	2.99948	0.04639	0.00119934	0.071454	29.29	0.399915	-0.52
Little Cottonwood stock	CH-73	26	216.31	3.37792	0.048	0.00212876	0.044593	29.68	0.463487	2.9
Little Cottonwood stock	CH-73	27	221.337	3.53736	0.04783	0.00122175	-0.094649	29.03	0.463952	2.6
Little Cottonwood stock	CH-73	28	214.915	4.06745	0.0487	0.00146924	-0.041311	29.87	0.565315	4.3
Little Cottonwood stock	CH-73	29	215.936	3.00505	0.0494	0.00140575	0.020417	29.68	0.413039	5.7
Little Cottonwood stock	CH-73	30	215.146	4.2454	0.04744	0.00122193	0.1014	29.86	0.589216	1.7
Little Cottonwood stock	CH-73	31	217.108	3.20017	0.0462	0.00136153	0.11592	29.64	0.436893	-0.94
Little Cottonwood stock	CH-73	32	212.947	3.19101	0.0497	0.00196927	-0.26678	30.09	0.450898	6.4
Little Cottonwood stock	CH-73	33	221.239	3.27494	0.0463	0.00111439	-0.023259	29.08	0.430464	-0.7
Little Cottonwood stock	CH-73	34	211.506	3.48869	0.0462	0.00211277	-0.041979	30.42	0.501763	-0.98
Little Cottonwood stock	CH-73	35	227.894	3.32349	0.04962	0.0012087	0.075959	28.12	0.410088	6.3
Little Cottonwood stock	CH-73	36	219.01	3.23451	0.0482	0.00153925	0.30423	29.31	0.432873	3.3
Little Cottonwood stock	CH-73	37	216.45	3.35505	0.0462	0.00151452	0.078802	29.73	0.460825	-0.95
Little Cottonwood stock	CH-73	38	228.676	3.4639	0.0472	0.00152681	0.21625	28.11	0.4258	1.3
Little Cottonwood stock	CH-73	39	222.222	3.03744	0.04815	0.00111905	0.12327	28.89	0.394882	3.2
Little Cottonwood stock	CH-73	40	203.583	2.99836	0.047	0.00185569	0.10878	31.57	0.46496	0.69
Little Cottonwood stock	CH-73	41	234.687	4.1471	0.0464	0.00159724	0.27002	27.42	0.484534	-0.42
Little Cottonwood stock	CH-74	5	219.491	2.22896	0.0465	0.00125675	-0.19394	29.31	0.297648	-0.28
Little Cottonwood stock	CH-74	6	218.341	3.00757	0.04688	0.0012138	-0.19847	29.45	0.405664	0.57
Little Cottonwood stock	CH-74	7	227.842	2.63896	0.0473	0.00151422	-0.22857	28.21	0.32674	1.5
Little Cottonwood stock	CH-74	8	214.777	2.89204	0.0465	0.00198407	-0.091358	29.95	0.403287	-0.31
Little Cottonwood stock	CH-74	9	223.164	2.25038	0.0482	0.00152789	0.087885	28.76	0.290015	3.3
Little Cottonwood stock	CH-74	10	197.2	2.32627	0.0477	0.00183064	0.20955	32.57	0.384213	2.1
Little Cottonwood stock	CH-74	11	209.82	2.95938	0.0463	0.00189672	0.28367	30.66	0.432442	-0.77
Little Cottonwood stock	CH-74	12	221.092	2.45992	0.0463	0.00137257	0.076524	29.1	0.323772	-0.7
Little Cottonwood stock	CH-74	13	212.404	2.57	0.04641	0.0013033	0.020558	30.29	0.366496	-0.54
Little Cottonwood stock	CH-74	14	219.154	2.19786	0.0464	0.00138092	-0.31664	29.36	0.294447	-0.5
Little Cottonwood stock	CH-74	15	207.039	2.62918	0.0463	0.00165153	0.093255	31.08	0.394683	-0.79
Little Cottonwood stock	CH-74	16	211.999	2.93822	0.04648	0.00127406	0.01398	30.34	0.420499	-0.32
Little Cottonwood stock	CH-74	17	216.403	2.64404	0.0568	0.00253012	0.29016	29.34	0.358479	20	Discordant
Little Cottonwood stock	CH-74	18	216.779	2.27443	0.04837	0.00133735	0.096927	29.6	0.310562	3.7
Little Cottonwood stock	CH-74	19	210.793	2.35665	0.0486	0.00192437	-0.25238	30.43	0.340206	4.1
Little Cottonwood stock	CH-74	20	227.739	2.67316	0.0486	0.00176159	0.069313	28.17	0.330655	4.2
Little Cottonwood stock	CH-74	21	213.174	2.89296	0.0463	0.00149918	0.20538	30.18	0.409568	-0.75
Little Cottonwood stock	CH-74	22	217.155	2.52421	0.0624	0.00226375	-0.088293	29.2	0.33942	29	Discordant
Little Cottonwood stock	CH-74	23	224.719	2.55169	0.049	0.00154016	-0.1113	28.56	0.324299	5
Little Cottonwood stock	CH-74	24	229.674	2.63414	0.0482	0.00244222	0.065321	27.95	0.32056	3.4
Little Cottonwood stock	CH-74	25	217.486	2.59623	0.0565	0.00179862	0.0071771	29.2	0.348574	19	Discordant
Little Cottonwood stock	CH-74	26	220.361	2.32581	0.04668	0.00135242	-0.078974	29.19	0.308087	0.15
Little Cottonwood stock	CH-74	27	217.77	2.56784	0.0475	0.00182812	0.034809	29.5	0.34785	1.8
Little Cottonwood stock	CH-74	28	213.22	2.17131	0.0475	0.00159123	-0.1012	30.14	0.306929	1.8
Little Cottonwood stock	CH-74	29	211.506	2.33878	0.04646	0.00131667	0.12789	30.41	0.336266	-0.33
Little Cottonwood stock	CH-74	30	209.293	2.84278	0.0463	0.00173134	-0.23964	30.74	0.417535	-0.78
Little Cottonwood stock	CH-74	31	229.095	2.45356	0.0463	0.00149918	0.30816	28.09	0.300838	-0.66
Little Cottonwood stock	CH-74	32	214.133	2.06227	0.04706	0.00122245	0.095657	30.02	0.289117	0.97
Little Cottonwood stock	CH-74	33	214.041	2.56726	0.0463	0.00142743	0.042917	30.06	0.360547	-0.74
Little Cottonwood stock	CH-74	34	217.581	2.59793	0.0491	0.0019305	0.073449	29.47	0.351875	5.1
Little Cottonwood stock	CH-74	35	212.269	2.66643	0.0462	0.00198067	-0.38493	30.31	0.380741	-0.98
Little Cottonwood stock	CH-74	36	223.864	2.23221	0.04634	0.0013599	0.15347	28.74	0.286574	-0.69
Little Cottonwood stock	CH-74	37	222.767	2.39122	0.0529	0.00189853	0.23564	28.64	0.307427	13	Discordant
Little Cottonwood stock	CH-74	38	217.297	2.33972	0.04656	0.00139704	-0.0064648	29.6	0.318714	-0.079
Little Cottonwood stock	CH-74	39	214.731	2.11615	0.04689	0.00129933	0.048087	29.94	0.295055	0.55
Little Cottonwood stock	CH-74	40	202.922	2.5482	0.0464	0.00270038	0.19776	31.7	0.398073	-0.6
Little Cottonwood stock	CH-74	41	214.592	2.88805	0.0475	0.00208135	0.022025	29.94	0.402941	1.8
White Pine phase	CH-108	1	237.982	2.3418	0.056	0.0013883	-0.56725	26.71	0.262833	19	Discordant
White Pine phase	CH-108	2	166.472	2.66271	0.2657	0.00900186	-0.31532	38.52	0.616123	180	Discordant
White Pine phase	CH-108	3	225.938	3.31391	0.0981	0.00715111	-0.87707	26.62	0.390446	75	Discordant
White Pine phase	CH-108	4	248.139	2.46162	0.0568	0.0018666	-0.71789	25.59	0.253861	20	Discordant
White Pine phase	CH-108	5	248.139	2.16673	0.0793	0.00211565	-0.58218	24.85	0.216989	54	Discordant
White Pine phase	CH-108	6	235.905	2.73343	0.0963	0.00398898	-0.54807	25.56	0.296164	73	Discordant
White Pine phase	CH-108	7	234.247	2.51005	0.05	0.00109052	-0.11348	27.44	0.29403	7.1
White Pine phase	CH-108	8	234.632	2.51717	0.0511	0.00175717	-0.014217	27.26	0.292451	9.2	Discordant
White Pine phase	CH-108	9	231.803	2.46506	0.0548	0.00110784	-0.37255	27.46	0.292017	17	Discordant
White Pine phase	CH-108	10	232.504	2.20854	0.0522	0.00175961	0.091223	27.47	0.260935	11	Discordant
White Pine phase	CH-108	11	234.192	2.79487	0.0492	0.00118035	0.043936	27.38	0.326756	5.4
White Pine phase	CH-108	12	239.406	2.27185	0.0639	0.00246355	-0.49306	26.28	0.249385	32	Discordant
White Pine phase	CH-108	13	244.978	2.40921	0.0487	0.00117878	-0.59029	26.19	0.257563	4.6
White Pine phase	CH-108	14	238.834	2.12727	0.05003	0.000990733	0.16175	26.82	0.238882	7.1
White Pine phase	CH-108	15	236.518	2.00889	0.04727	0.00102602	-0.56658	27.17	0.230771	1.5
White Pine phase	CH-108	16	236.295	2.26849	0.0556	0.00157607	-0.22561	26.91	0.258342	18	Discordant
White Pine phase	CH-108	17	231.482	2.55086	0.0554	0.00120096	-0.4847	27.48	0.302822	18	Discordant
White Pine phase	CH-108	18	231.321	2.50185	0.04733	0.000864381	-0.029723	27.78	0.300454	1.6
White Pine phase	CH-108	19	210.261	3.56027	0.1502	0.00978762	-0.52604	30.55	0.517292	120	Discordant
White Pine phase	CH-108	20	205.423	3.05238	0.0493	0.00412237	0.21012	31.2	0.463601	5.5
White Pine phase	CH-108	21	225.581	3.16369	0.0516	0.00109614	-0.17628	28.33	0.397319	10	Discordant
White Pine phase	CH-108	22	240.848	2.20171	0.0473	0.00102613	-0.42688	26.69	0.243986	1.6
White Pine phase	CH-108	23	237.248	2.23816	0.0642	0.00246414	-0.53481	26.51	0.250091	32	Discordant
White Pine phase	CH-108	24	237.869	1.86225	0.04988	0.000857857	-0.36033	26.93	0.210832	6.9
White Pine phase	CH-108	25	226.809	2.3312	0.0532	0.00156978	-0.57302	28.12	0.289025	13	Discordant
White Pine phase	CH-108	26	218.293	2.34518	0.0754	0.00307088	-0.34385	29.44	0.316282	48	Discordant
White Pine phase	CH-108	27	236.798	1.97078	0.04889	0.0010045	-0.14966	27.15	0.225959	4.8
White Pine phase	CH-108	28	226.449	2.49933	0.0819	0.00366984	-0.35732	28.38	0.313232	57	Discordant
White Pine phase	CH-108	29	195.427	2.78305	0.2024	0.00868048	-0.81056	32.85	0.467813	150	Discordant
White Pine phase	CH-108	30	232.45	2.16428	0.0619	0.00226495	-0.37682	27.14	0.252693	29	Discordant
White Pine phase	CH-108	31	229.043	2.37049	0.0795	0.00269042	-0.52765	26.92	0.27861	54	Discordant
White Pine phase	CH-108	32	224.669	2.91071	0.0715	0.00277073	-0.3245	27.73	0.359258	43	Discordant
White Pine phase	CH-108	33	239.464	2.95907	0.0594	0.00245501	-0.67057	26.43	0.326598	25	Discordant
White Pine phase	CH-108	34	218.627	3.16228	0.0808	0.00240503	-0.19894	29.39	0.425105	56	Discordant
White Pine phase	CH-108	35	235.682	1.72513	0.0469	0.000676822	0.071127	27.284	0.199712	0.66
White Pine phase	CH-108	36	230.84	2.67739	0.0643	0.00453464	-0.85574	27.24	0.315942	32	Discordant
White Pine phase	CH-108	37	239.063	2.04288	0.0547	0.00129092	-0.11459	26.89	0.229785	16	Discordant
White Pine phase	CH-108	38	223.364	2.70178	0.0721	0.00404888	-0.75894	27.87	0.337112	44	Discordant
White Pine phase	CH-108	39	231.321	2.64049	0.0897	0.00506053	-0.69385	26.29	0.300096	66	Discordant
White Pine phase	CH-108	40	246.124	2.28085	0.05041	0.00106454	-0.234	26.01	0.241037	8
White Pine phase	CH-108	41	218.341	6.3169	0.0589	0.00532471	0.20663	29	0.839011	23	Discordant
White Pine phase	CH-108	42	230.734	3.24929	0.0731	0.00414903	-0.34412	27.86	0.392336	45	Discordant
White Pine phase	CH-108	43	237.361	1.89609	0.04731	0.000855519	0.1696	27.08	0.216321	1.5
White Pine phase	CH-108	44	241.78	2.12423	0.0495	0.00108879	-0.019254	26.51	0.232912	6.1
White Pine phase	CH-108	45	232.234	2.16099	0.0542	0.00195764	-0.7157	27.43	0.255242	15	Discordant
White Pine phase	CH-108	46	237.023	2.14531	0.056	0.00157714	-0.53866	26.82	0.24275	19	Discordant
White Pine phase	CH-108	47	235.849	3.23044	0.0627	0.00207306	-0.23639	26.72	0.365986	30	Discordant
White Pine phase	CH-108	48	222.321	2.54894	0.0869	0.00387448	-0.44637	28.9	0.331342	63	Discordant
White Pine phase	CH-108	49	243.665	2.89479	0.0539	0.00138199	-0.60205	26.16	0.310787	15	Discordant
Ped Pine porphyry	CH-115	1	247.954	2.82418	0.0705	0.00257414	0.048386	25.16	0.28657	41	Discordant
Ped Pine porphyry	CH-115	2	244.26	2.64786	0.062	0.00140746	0.32587	25.82	0.279898	29	Discordant
Ped Pine porphyry	CH-115	3	251.319	1.84957	0.04843	0.000692841	0.0091294	25.539	0.187953	3.9
Ped Pine porphyry	CH-115	4	239.981	2.51925	0.0746	0.00355967	-0.61333	25.86	0.271471	47	Discordant
Ped Pine porphyry	CH-115	5	262.743	2.65423	0.05227	0.00102625	0.13512	24.31	0.24558	12
Ped Pine porphyry	CH-115	6	239.923	2.71573	0.0492	0.00118035	-0.35765	26.72	0.302448	5.6
Ped Pine porphyry	CH-115	7	252.972	2.04287	0.04792	0.000893257	0.047504	25.39	0.205036	2.9
Ped Pine porphyry	CH-115	8	229.727	2.42718	0.0481	0.00117691	0.21561	27.95	0.295306	3.2
Ped Pine porphyry	CH-115	9	253.936	2.10173	0.05026	0.00108227	-0.24516	25.22	0.208736	7.7
Ped Pine porphyry	CH-115	10	254.712	3.96362	0.126	0.00310027	-0.5717	22.72	0.353549	100	Discordant
Ped Pine porphyry	CH-115	11	229.463	3.80403	0.1179	0.00608705	-0.044233	26.25	0.435171	93	Discordant
Ped Pine porphyry	CH-115	12	249.066	2.84649	0.052	0.00175917	-0.2785	25.65	0.293145	11
Ped Pine porphyry	CH-115	13	247.77	2.76721	0.0531	0.00128585	-0.08419	25.81	0.288258	13
Ped Pine porphyry	CH-115	14	236.686	3.56107	0.089	0.00436916	-0.64933	25.72	0.38697	66	Discordant
Ped Pine porphyry	CH-115	15	224.316	3.50358	0.0648	0.00344642	-0.42135	28.02	0.437643	33	Discordant
Ped Pine porphyry	CH-115	16	213.767	3.11783	0.05	0.00137085	0.19894	29.96	0.436972	7
Ped Pine porphyry	CH-115	17	246.002	3.10601	0.05663	0.000956627	-0.50698	25.82	0.326002	21	Discordant
Ped Pine porphyry	CH-115	18	246.792	3.5675	0.071	0.00404741	-0.76277	25.26	0.365147	43	Discordant
Ped Pine porphyry	CH-115	19	241.955	3.17247	0.0518	0.00185556	0.09291	26.41	0.346283	11
Ped Pine porphyry	CH-115	20	251.699	1.98224	0.04875	0.00061837	0.074417	25.49	0.200745	4.6
Ped Pine porphyry	CH-115	21	218.866	2.35584	0.053	0.00137935	0.043397	29.15	0.313765	13
Ped Pine porphyry	CH-115	22	256.082	2.32983	0.052	0.0011894	-0.53802	24.95	0.226994	11
Ped Pine porphyry	CH-115	23	256.542	2.33662	0.05006	0.000701555	0.11918	24.97	0.22743	7.3
Ped Pine porphyry	CH-115	24	248.818	2.47296	0.0721	0.00257749	-0.49152	25.02	0.24867	44	Discordant
Ped Pine porphyry	CH-115	25	249.439	2.43216	0.0586	0.00274771	-0.691	25.4	0.247664	23	Discordant
Ped Pine porphyry	CH-115	26	233.1	3.01412	0.0764	0.00435107	-0.78638	26.56	0.343436	50	Discordant
Ped Pine porphyry	CH-115	27	237.756	2.33807	0.065	0.00285653	-0.4607	26.43	0.259911	33	Discordant
Ped Pine porphyry	CH-115	28	234.687	2.90317	0.04905	0.00101415	0.16162	27.32	0.33796	5.1
Ped Pine porphyry	CH-115	29	267.738	2.33657	0.05077	0.000697637	-0.098132	23.94	0.208927	8.8
Ped Pine porphyry	CH-115	30	242.542	3.78191	0.04759	0.00090079	-0.014937	26.5	0.413209	2.2
Ped Pine porphyry	CH-115	31	241.313	3.15718	0.1348	0.00572148	-0.77935	23.69	0.309945	110	Discordant
Ped Pine porphyry	CH-115	32	254.518	5.24996	0.0772	0.00395741	-0.65266	24.3	0.501238	52	Discordant
Ped Pine porphyry	CH-115	33	256.608	4.51488	0.0781	0.00494689	0.012344	24.07	0.423499	52	Discordant
Ped Pine porphyry	CH-115	34	236.798	3.72088	0.04995	0.000936881	-0.055415	27.08	0.425515	7
Ped Pine porphyry	CH-115	35	251.004	2.66835	0.0542	0.00195764	-0.13976	25.46	0.270658	15	Discordant
Ped Pine porphyry	CH-115	36	248.324	2.26533	0.05199	0.000910322	0.030975	25.73	0.234722	11
Ped Pine porphyry	CH-115	37	249.004	2.79136	0.049	0.00127347	0.20331	25.76	0.288772	5.1
Ped Pine porphyry	CH-115	39	231.374	3.76333	0.1192	0.00747231	-0.62201	26	0.422893	95	Discordant
Ped Pine porphyry	CH-115	40	250.815	2.35255	0.0714	0.00135125	0.156	24.85	0.233084	43	Discordant
Ped Pine porphyry	CH-115	41	128.041	10.3534	0.356	0.0311543	-0.97881	30.58	2.4727	210	Discordant
Ped Pine porphyry	CH-115	42	253.743	2.39793	0.0572	0.0016756	0.47687	25.01	0.23635	21	Discordant
Ped Pine porphyry	CH-115	43	262.605	2.48237	0.05074	0.000630371	0.13885	24.37	0.230366	8.7
Ped Pine porphyry	CH-115	44	235.073	2.86257	0.0909	0.00378357	-0.12011	26.29	0.320143	67	Discordant
Ped Pine porphyry	CH-115	45	246.063	2.6301	0.0513	0.00137448	-0.25331	25.99	0.2778	9.7
Ped Pine porphyry	CH-115	46	244.26	3.33612	0.065	0.0048332	-0.27214	25.91	0.353881	33	Discordant
Ped Pine porphyry	CH-115	47	244.081	2.15659	0.0523	0.00137733	-0.36995	26.17	0.231227	12
Ped Pine porphyry	CH-115	48	257.931	2.51789	0.0541	0.00138258	-0.085853	24.78	0.241899	15	Discordant
Ped Pine porphyry	CH-115	49	242.601	2.56667	0.0795	0.00386243	-0.36082	25.74	0.272325	54	Discordant
Ped Pine porphyry	CH-115	50	239.234	2.00229	0.0492	0.000689071	0.019309	26.8	0.224304	5.5
Ped Pine porphyry	CH-115	51	243.368	2.83645	0.0725	0.00306559	-0.54197	25.57	0.298018	45	Discordant
White Pine Phase	CH-127	1	130.378	12.6238	0.331	0.021199	-0.54064	31.59	3.0587	220	Discordant
White Pine Phase	CH-127	2	238.322	7.67395	0.04715	0.00133058	0.014679	26.97	0.868431	1.2
White Pine Phase	CH-127	3	236.351	6.02046	0.0489	0.0047012	-0.11034	27.16	0.691835	4.8
White Pine Phase	CH-127	4	248.201	2.67263	0.0468	0.000719116	0.14091	25.91	0.279	0.5
White Pine Phase	CH-127	5	222.222	13.641	0.0472	0.00325602	0.11313	28.92	1.77524	1.2
White Pine Phase	CH-127	6	230.362	3.63728	0.04926	0.00118208	0.062578	27.83	0.43942	5.5
White Pine Phase	CH-127	7	243.428	5.50353	0.04939	0.00215887	-0.26052	26.33	0.595281	5.9
White Pine Phase	CH-127	8	236.239	4.46474	0.0487	0.00105042	0.16317	27.16	0.513304	4.5
White Pine Phase	CH-127	9	240.211	8.5999	0.056	0.0067016	-0.2875	26.46	0.947304	19	Discordant
White Pine Phase	CH-127	10	243.309	15.6274	0.0637	0.0021542	-0.78291	25.87	1.6616	50	Discordant
White Pine Phase	CH-127	11	222.965	4.60867	0.04616	0.00115683	0.17611	28.86	0.596533	-1
White Pine Phase	CH-127	12	237.756	9.09913	0.0521	0.00233701	-0.08108	26.87	1.02834	11	Discordant
White Pine Phase	CH-127	13	239.866	4.69898	0.04709	0.00120182	-0.0062573	26.81	0.525209	1.1
White Pine Phase	CH-127	14	224.215	11.2346	0.0702	0.00345956	-0.04239	28.09	1.40749	43	Discordant
White Pine Phase	CH-127	15	227.066	6.10923	0.0602	0.00122926	-0.47069	27.84	0.749036	32	Discordant
White Pine Phase	CH-127	16	237.812	6.22034	0.0498	0.00164736	-0.4973	26.94	0.704657	7.2
White Pine Phase	CH-127	17	244.858	8.77688	0.0519	0.00146909	0.16628	26.1	0.935548	11	Discordant
White Pine Phase	CH-127	18	238.095	5.10701	0.0463	0.00269692	0.31359	27.03	0.579778	-0.62
White Pine Phase	CH-127	19	237.417	5.94133	0.0516	0.00138372	-0.078055	26.92	0.673669	10
White Pine Phase	CH-127	20	260.213	5.0478	0.0486	0.00265779	-0.68311	24.66	0.478372	4.5
White Pine Phase	CH-127	21	231.803	4.28595	0.0538	0.00456762	0.11461	27.5	0.508464	14	Discordant
White Pine Phase	CH-127	22	239.693	7.19069	0.0509	0.000968861	-0.094856	26.69	0.800688	9.3
White Pine Phase	CH-127	23	240.154	5.66175	0.048	0.00166454	0.19758	26.74	0.630409	3
White Pine Phase	CH-127	24	244.918	4.00077	0.0511	0.000844217	-0.031512	26.16	0.427328	9.3
White Pine Phase	CH-127	25	242.014	2.75807	0.04908	0.00100958	-0.19993	26.5	0.302003	5.3
White Pine Phase	CH-127	26	238.039	4.77407	0.04801	0.0025208	0.067017	26.98	0.541108	3
White Pine Phase	CH-127	27	235.571	4.52195	0.04859	0.001464	-0.092177	27.26	0.523274	4.2
White Pine Phase	CH-127	28	243.784	4.33656	0.04867	0.00137181	-0.075012	26.34	0.468551	4.4
White Pine Phase	CH-127	29	226.296	14.037	0.0933	0.00675996	-0.67847	26.75	1.65929	76	Discordant
White Pine Phase	CH-127	30	240.616	6.07864	0.04831	0.0012272	0.045885	26.68	0.674012	3.6
White Pine Phase	CH-127	31	236.295	5.01904	0.0503	0.00127805	-0.1429	27.1	0.57562	7.8
White Pine Phase	CH-127	32	236.911	4.40224	0.04678	0.00157746	0.25748	27.15	0.504497	0.41
White Pine Phase	CH-127	33	238.493	3.39575	0.04692	0.000947729	-0.01611	26.97	0.38401	0.71
White Pine Phase	CH-127	34	240.154	4.07365	0.05162	0.000958013	0.03505	26.62	0.451547	10
White Pine Phase	CH-127	35	243.25	4.64399	0.0617	0.00165169	0.075933	25.94	0.495232	28	Discordant
White Pine Phase	CH-127	36	211.104	24.8198	0.0722	0.00649996	-0.13414	29.48	3.466	50	Discordant
White Pine Phase	CH-127	37	235.793	5.54082	0.0489	0.00126446	0.045598	27.2	0.639162	4.8
White Pine Phase	CH-127	38	242.542	4.70196	0.0487	0.000851516	0.16225	26.45	0.512765	4.5
White Pine Phase	CH-127	39	248.509	3.72987	0.04842	0.000740926	-0.18013	25.83	0.387682	4
White Pine Phase	CH-127	40	232.072	4.11992	0.0498	0.000667522	-0.051902	27.61	0.490153	6.7
White Pine Phase	CH-127	41	244.141	4.40085	0.0588	0.00117478	-0.38572	25.94	0.467591	25	Discordant
White Pine Phase	CH-127	42	219.732	7.04484	0.0484	0.00159126	0.18953	29.21	0.936504	3.8
White Pine Phase	CH-127	43	238.663	4.32931	0.04723	0.00130267	0.050682	26.93	0.488505	1.4
White Pine Phase	CH-127	44	238.72	4.39044	0.047	0.0015292	0.20076	26.93	0.495284	0.89
White Pine Phase	CH-127	45	221.239	8.9885	0.0479	0.00347291	0.022135	29.03	1.17943	2.7
White Pine Phase	CH-127	46	249.128	3.79916	0.0561	0.00189108	0.07112	25.51	0.389023	19	Discordant
White Pine Phase	CH-127	47	229.516	4.44352	0.04806	0.000941138	0.13551	27.97	0.541511	3.1
White Pine Phase	CH-127	48	238.607	5.76137	0.0503	0.0038939	0.080157	26.83	0.647835	7.7
White Pine Phase	CH-127	49	236.63	4.24936	0.049	0.000825878	0.073548	27.1	0.486656	5
White Pine Phase	CH-127	50	241.663	11.9864	0.0551	0.00291546	-0.47997	26.33	1.30596	19	Discordant
White Pine Phase	CH-127	51	247.647	8.74947	0.0533	0.00401033	-0.18724	25.76	0.91011	14	Discordant
White Pine Phase	CH-160	9	237.756	3.11839	0.04879	0.00105021	-0.26174	26.98	0.353869	4.7
White Pine Phase	CH-160	10	223.614	4.00929	0.0521	0.0015879	0.11097	28.57	0.512247	11	Discordant
White Pine Phase	CH-160	11	225.734	5.21907	0.0505	0.00225722	-0.31078	28.35	0.655466	8.1
White Pine Phase	CH-160	12	203.666	11.6589	0.0521	0.0037365	-0.93361	31.36	1.79521	13	Discordant
White Pine Phase	CH-160	13	224.719	5.66735	0.05	0.00158114	0.52146	28.5	0.718762	7.5
White Pine Phase	CH-160	14	207.039	4.82748	0.0577	0.00374472	-0.23491	30.63	0.714191	21	Discordant
White Pine Phase	CH-160	15	186.567	7.02368	0.0801	0.00300859	-0.091977	33.44	1.25891	57	Discordant
White Pine Phase	CH-160	19	235.183	3.20995	0.0501	0.00148694	-0.16494	27.23	0.371655	7.3
White Pine Phase	CH-160	20	223.664	2.55852	0.0667	0.00249096	-0.079006	28.24	0.323041	36	Discordant
White Pine Phase	CH-160	21	231.16	2.57203	0.0521	0.00130822	0.063452	27.63	0.307428	11	Discordant
White Pine Phase	CH-160	22	234.247	2.83246	0.0493	0.00111492	0.019188	27.37	0.330952	5.6
White Pine Phase	CH-160	23	206.996	3.13241	0.0759	0.00614704	-0.72958	29.92	0.452769	49	Discordant
White Pine Phase	CH-160	26	227.842	3.36532	0.0489	0.00105072	0.33933	28.15	0.415787	4.9
White Pine Phase	CH-160	27	207.857	4.1921	0.04929	0.000982573	0.11971	30.84	0.621986	5.5
White Pine Phase	CH-160	28	227.946	3.61376	0.05084	0.00110402	0.0388	28.07	0.44501	8.7
White Pine Phase	CH-160	29	219.78	3.0094	0.0514	0.00149137	-0.12098	29.14	0.399008	9.8	Discordant
White Pine Phase	CH-160	30	217.675	2.91185	0.04656	0.000743763	0.1244	29.55	0.395292	-0.16
White Pine Phase	CH-160	33	210.748	3.07326	0.04661	0.000874557	0.184	30.52	0.445061	-0.097
White Pine Phase	CH-160	34	222.866	3.84073	0.0465	0.0014752	0.40739	28.86	0.497355	-0.27
White Pine Phase	CH-160	35	239.406	3.31845	0.054	0.0013159	-0.060386	26.69	0.369954	15	Discordant
White Pine Phase	CH-160	36	240.558	2.60858	0.04943	0.00104438	-0.10402	26.67	0.289206	6
White Pine Phase	CH-160	37	178.891	9.00508	0.125	0.0190411	-0.22232	33.43	1.68281	99	Discordant
White Pine Phase	CH-160	38	239.234	12.0783	0.084	0.0170207	0.18255	25.62	1.29349	59	Discordant
White Pine Phase	CH-160	39	237.699	2.65402	0.04789	0.00098435	0.25625	27.02	0.301691	2.8
White Pine Phase	CH-160	42	221.729	7.94398	0.0749	0.00853294	-0.033191	28.28	1.0132	47	Discordant
White Pine Phase	CH-160	43	245.218	5.54903	0.0505	0.00235479	0.13453	26.1	0.590615	8.1
White Pine Phase	CH-160	44	218.723	3.65952	0.0536	0.00393666	0.39873	29.15	0.487718	14
White Pine Phase	CH-160	45	232.558	5.53192	0.0563	0.00334768	0.26284	27.32	0.649867	19	Discordant
White Pine Phase	CH-160	46	234.357	2.9857	0.055	0.00236485	-0.69366	27.16	0.346018	17	Discordant
White Pine Phase	CH-160	47	235.849	5.6861	0.0501	0.00215894	0.58566	27.15	0.654562	7.6
White Pine Phase	CH-160	48	236.351	3.5013	0.0525	0.00275057	0.18631	27.01	0.400126	12
White Pine Phase	CH-160	49	221.239	5.01811	0.04775	0.000923096	-0.31378	29.03	0.658454	2.6
White Pine Phase	CH-160	50	201.572	3.0942	0.0491	0.00129657	-0.15271	31.8	0.488141	5.1
White Pine Phase	CH-160	51	223.214	2.91283	0.0501	0.00111848	-0.36892	28.69	0.374389	7.4	Discordant
White Pine Phase	CH-160	52	236.128	2.97624	0.04607	0.000914519	0.096368	27.26	0.343596	-1.1
White Pine Phase	CH-160	55	218.341	5.35642	0.0896	0.00517811	-0.50901	27.86	0.683473	67	Discordant
White Pine Phase	CH-160	56	230.415	4.60605	0.0819	0.00447557	-0.23941	27.04	0.540536	57	Discordant
White Pine Phase	CH-160	57	229.938	3.52373	0.0514	0.00158562	0.15156	27.81	0.42618	9.8	Discordant
White Pine Phase	CH-160	58	208.333	4.88662	0.0487	0.00129506	0.2576	30.79	0.722203	4.4
White Pine Phase	CH-160	59	210.526	10.2481	0.121	0.017043	-0.69872	27.68	1.34742	97	Discordant
White Pine Phase	CH-160	60	238.152	4.41725	0.0583	0.00227594	-0.12192	26.73	0.495789	23	Discordant
White Pine Phase	CH-160	61	238.607	3.51103	0.0485	0.00102236	-0.18378	26.9	0.395826	4.1
White Pine Phase	CH-160	64	215.054	5.19969	0.0463	0.00137999	-0.053202	29.92	0.723422	-0.74
White Pine Phase	CH-160	65	231.267	4.07201	0.0459	0.00156866	0.16421	27.84	0.490189	-1.5
White Pine Phase	CH-160	66	214.592	4.72833	0.0473	0.00128986	0.062159	29.95	0.659919	1.4
White Pine Phase	CH-160	67	230.256	4.24159	0.049	0.00176921	0.18237	27.85	0.513031	5
White Pine Phase	CH-160	68	241.022	4.01898	0.04695	0.0010151	0.059155	26.68	0.444882	0.79
White Pine Phase	CH-160	69	241.429	3.58976	0.05036	0.00108407	0.050571	26.52	0.394321	7.8
White Pine Phase	CH-160	70	230.947	7.55586	0.0532	0.00206955	0.32755	27.62	0.90364	13	Discordant
White Pine Phase	CH-160	71	239.693	3.37954	0.04814	0.00087444	0.026869	26.79	0.377725	3.3
White Pine Phase	CH-160	72	241.488	3.70145	0.04762	0.000871588	0.20901	26.6	0.407717	2.2
White Pine Phase	CH-160	73	212.314	6.84443	0.0584	0.00325285	-0.19147	29.84	0.961959	23	Discordant
White Pine Phase	CH-160	74	227.169	4.03367	0.0522	0.00130862	-0.34702	28.12	0.499305	12	Discordant
White Pine Phase	CH-160	75	233.699	3.73737	0.0507	0.00130271	-0.036647	27.42	0.438506	8.5
White Pine Phase	CH-160	78	211.864	5.48956	0.0504	0.00158241	-0.23832	30.21	0.782763	7.9
White Pine Phase	CH-160	79	234.742	4.40233	0.0472	0.00128949	-0.10197	27.38	0.513483	1.3
White Pine Phase	CH-160	80	200.401	4.52986	0.0578	0.00198597	-0.14345	31.64	0.715191	22	Discordant
White Pine Phase	CH-160	81	216.685	3.46063	0.0553	0.00178768	-0.023592	29.45	0.47034	17	Discordant
White Pine Phase	CH-160	82	237.643	5.27471	0.0589	0.00247122	-0.03185	26.77	0.594186	24	Discordant
White Pine Phase	CH-160	83	240.096	3.22905	0.052	0.00187361	0.022589	26.61	0.357877	11	Discordant
White Pine Phase	CH-160	84	242.483	4.00957	0.0475	0.00129059	0.29721	26.5	0.43819	2
White Pine Phase	CH-160	85	219.202	3.53754	0.0519	0.00121629	-0.011626	29.2	0.471237	11	Discordant
White Pine Phase	CH-160	86	240.269	4.21584	0.0516	0.00130624	0.093321	26.6	0.466732	10
White Pine Phase	CH-160	87	204.082	4.69369	0.04852	0.00109354	0.029239	31.44	0.72309	3.9
White Pine Phase	CH-160	88	233.481	4.0949	0.0469	0.00119581	0.26454	27.54	0.483009	0.66
White Pine Phase	CH-160	89	242.836	3.29805	0.04684	0.00101459	0.011889	26.48	0.359635	0.56
White Pine Phase	CH-160	90	244.678	3.40065	0.0466	0.00119464	0.012269	26.29	0.365391	0.059
White Pine Phase	CH-160	91	211.775	3.7839	0.0569	0.00305348	-0.63305	29.98	0.535671	20	Discordant
White Pine Phase	CH-160	92	233.372	3.93491	0.052	0.00216342	0.063813	27.38	0.461657	11
White Pine Phase	CH-160	93	220.751	7.39248	0.0467	0.00392786	0.11826	29.13	0.975504	0.15
White Pine Phase	CH-160	94	230.097	3.13098	0.054	0.00150053	-0.45248	27.69	0.376784	15	Discordant
White Pine Phase	CH-160	95	221.729	5.5205	0.0606	0.00444154	-0.3975	28.5	0.709578	26	Discordant
White Pine Phase	CH-160	96	233.754	3.02186	0.0514	0.00149137	-0.27434	27.35	0.353568	9.9
White Pine Phase	CH-160	97	222.668	4.83997	0.0557	0.00503093	-0.46685	28.55	0.620572	18
White Pine Phase	CH-160	98	228.885	3.24691	0.0503	0.00206228	-0.032157	28.01	0.397342	7.6
White Pine Phase	CH-160	99	220.022	2.88085	0.0494	0.00284324	0.21087	29.13	0.381413	5.8

## Sheet: Notes
Notes
All age calculations completed with IsoPlotR (Vermeesch, 2018)
Ages in Data sheet are corrected for common Pb using Stacy and Kramers (1975) model
238U/ 206Pb Age (Ma) is corrected for common Pb using Stacy and Kramers (1975) model and the calculated age
Discordance is the distance from concordia before common Pb correction as calculated by Vermeesch's (2018) IsoPlotR app
	The logratio distance (%) measured along a line connecting the measured composition and the corresponding single grain concordia age composition.
